# Supplementary material
Source: PubMed Central journal article supplement (PMC2780778)
Supplement: 0907504106_0907504106SI.pdf [file 0907504106_0907504106SI.pdf]

# Supporting Information

Sabree et al. 10.1073/pnas.0907504106

## SI Text

**Phylogenetic Analysis.** The following proteins were used in this analysis: elongation factor Tu; initiation factor 2; leucyl-tRNA synthetase; phenylalanyl-tRNA synthetase, beta subunit; valyl-tRNA synthetase; RNA polymerase, beta subunit; and ribosomal protein subunits L2, S5 and S11. Amino acid sequences were obtained from the following genomes (Genbank accession numbers): *Bacillus subtilis* str. 168 (AL009126), *Bacteroides*

*fragilis* NCTC 9343 (CR626927), *B. fragilis* YCH46 (AP006841), *B. thetaiotaomicron* VPI-5482 (AE015928), Candidatus *Sulcia muelleri* GWSS (CP000770), *Chlorobaculum parvum* NCIB 8327 (CP001099), *Chlorobium phaeobacteroides* BS1 (CP001101), *Cytophaga hutchinsonii* ATCC 33406 (CP000383), *Flavobacteriales bacterium* HTCC2170 (AAOC000000000), *Flavobacterium johnsoniae* UW101 (CP000685), *Gramella forsetii* KT0803 (CU207366), and *Salinibacter ruber* DSM 13855 (CP000159).



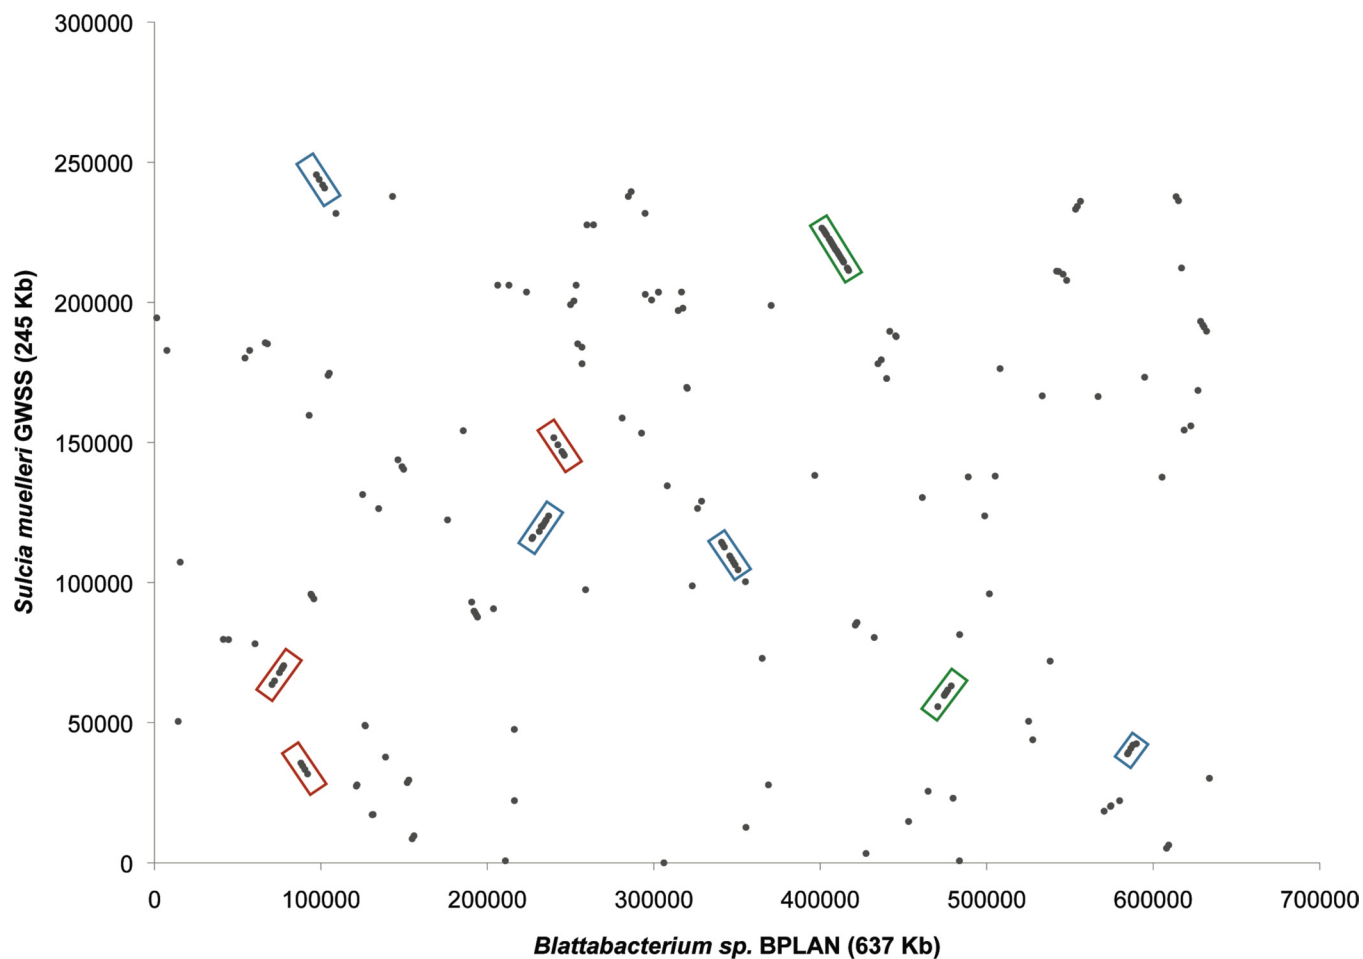

**Fig. S2.** Gene order dot-plot comparison of homologous proteins from *Blattabacterium* sp. BPLAN and *Sulcia muelleri* GWSS. Genes encoding proteins involved in translation and ribosome structure (green), amino acid biosynthesis (blue), and energy production (red) pathways are indicated.

**Table S1. COG distribution of chromosomal and plasmid-encoded *Blattabacterium* sp. BPLAN genes compared with those of other Flavobacteriales**

|                                                                  | <i>Blattabacterium</i> sp.<br>BPLAN (563) | <i>Sulcia muelleri</i><br>GWSS (226) | <i>Flavobacterium johnsonii</i><br>UW101 (3,481) |
|------------------------------------------------------------------|-------------------------------------------|--------------------------------------|--------------------------------------------------|
| Amino acid transport and metabolism                              | 13.14                                     | 20.35                                | 7.35                                             |
| Carbohydrate transport and metabolism                            | 3.55                                      | 1.33                                 | 7.04                                             |
| Cell cycle control, cell division, and chromosome partitioning   | 1.60                                      | 1.33                                 | 0.57                                             |
| Cell motility and secretion                                      | 0.18                                      | <1                                   | 0.26                                             |
| Cell wall, envelope, and outer membrane biogenesis               | 6.39                                      | 2.65                                 | 7.99                                             |
| Coenzyme metabolism                                              | 7.82                                      | 4.42                                 | 3.96                                             |
| Defense mechanisms                                               | 0.71                                      | –                                    | 1.95                                             |
| DNA replication, recombination, and repair                       | 5.33                                      | 3.54                                 | 4.91                                             |
| Energy production and conversion                                 | 7.10                                      | 11.95                                | 4.77                                             |
| Function unknown                                                 | 2.31                                      | 0.44                                 | 8.56                                             |
| General function prediction only                                 | 7.64                                      | 3.54                                 | 12.90                                            |
| Inorganic ion transport and metabolism                           | 2.66                                      | 0.88                                 | 5.75                                             |
| Intracellular trafficking, secretion, and vesicular transport    | 2.66                                      | 3.54                                 | 1.41                                             |
| Lipid metabolism                                                 | 3.55                                      | 0.88                                 | 3.76                                             |
| Nucleotide transport and metabolism                              | 5.86                                      | 1.33                                 | 2.10                                             |
| Posttranslational modification, protein turnover, and chaperones | 5.15                                      | 6.64                                 | 3.85                                             |
| Secondary metabolite biosynthesis, transport, and catabolism     | 1.24                                      | 0.88                                 | 2.84                                             |
| Signal transduction mechanisms                                   | 0.36                                      | <1                                   | 6.75                                             |
| Transcription                                                    | 2.84                                      | 2.21                                 | 8.45                                             |
| Translation, ribosomal structure, and biogenesis                 | 19.89                                     | 34.07                                | 4.83                                             |

The COG distributions are represented as percentages of coding sequences assigned to a category. The values in parentheses represent the number of ORFs assigned to COGs in the genome.
